# Supplementary material for: The crystalline sponge method: a solvent-based strategy to facilitate noncovalent ordered trapping of solid and liquid organic compounds
Source: Royal Society of Chemistry journal article supplement (doi:10.1039/c7ce00885f), 2017-01-01
Supplement: c7ce00885f1.pdf [file c7ce00885f1.pdf]

## Supporting Information

### The Crystalline Sponge Method: A Solvent-Based Strategy to Facilitate Noncovalent Ordered Trapping of Solid and Liquid Organic Compounds

Timothy R. Ramadhar,<sup>a,\*</sup> Shao-Liang Zheng,<sup>b</sup> Yu-Sheng Chen,<sup>c</sup> and Jon Clardy<sup>a,\*</sup>

<sup>a</sup> *Department of Biological Chemistry and Molecular Pharmacology, Harvard Medical School, 240 Longwood Avenue, Boston, Massachusetts, 02115, United States of America*

<sup>b</sup> *Department of Chemistry and Chemical Biology, Harvard University, 12 Oxford Street, Cambridge, Massachusetts, 02138, United States of America*

<sup>c</sup> *ChemMatCARS, Center for Advanced Radiation Sources, The University of Chicago c/o Advanced Photon Source, Argonne National Laboratory, 9700 South Cass Avenue, Argonne, Illinois, 60439, United States of America*

E-mail: timothy\_ramadhar@hms.harvard.edu; jon\_clardy@hms.harvard.edu

## Table of contents

|                                                                |    |
|----------------------------------------------------------------|----|
| <b>Table S1.</b> Crystallographic details for <b>1·2</b> ..... | S2 |
| <b>Table S2.</b> Crystallographic details for <b>1·3</b> ..... | S3 |
| <b>Table S3.</b> Crystallographic details for <b>1·4</b> ..... | S4 |
| <b>Table S4.</b> Crystallographic details for <b>1·5</b> ..... | S5 |
| Void Analysis .....                                            | S6 |

**Table S1.** Crystallographic details for **1-2**

|                                                                                                                |                                                                                                                                                                                                                                                                  |
|----------------------------------------------------------------------------------------------------------------|------------------------------------------------------------------------------------------------------------------------------------------------------------------------------------------------------------------------------------------------------------------|
|                                                                                                                | tim73-transstilbene-mtbe_a   CCDC 1545812                                                                                                                                                                                                                        |
| Crystal data                                                                                                   |                                                                                                                                                                                                                                                                  |
| Chemical formula                                                                                               | C <sub>36</sub> H <sub>24</sub> I <sub>6</sub> N <sub>12</sub> Zn <sub>3</sub> ·2.04(C <sub>14</sub> H <sub>12</sub> )                                                                                                                                           |
| <i>M<sub>r</sub></i>                                                                                           | 1949.83                                                                                                                                                                                                                                                          |
| Crystal system, space group                                                                                    | Monoclinic, <i>C2/c</i>                                                                                                                                                                                                                                          |
| Temperature (K)                                                                                                | 100                                                                                                                                                                                                                                                              |
| <i>a</i> , <i>b</i> , <i>c</i> (Å)                                                                             | 34.9049 (14), 14.9409 (6), 34.5319 (14)                                                                                                                                                                                                                          |
| β (°)                                                                                                          | 107.5655 (8)                                                                                                                                                                                                                                                     |
| <i>V</i> (Å <sup>3</sup> )                                                                                     | 17169.0 (12)                                                                                                                                                                                                                                                     |
| <i>Z</i>                                                                                                       | 8                                                                                                                                                                                                                                                                |
| Radiation type                                                                                                 | Synchrotron, λ = 0.41328 Å                                                                                                                                                                                                                                       |
| μ (mm <sup>-1</sup> )                                                                                          | 0.70                                                                                                                                                                                                                                                             |
| Crystal size (mm)                                                                                              | 0.24 × 0.07 × 0.05                                                                                                                                                                                                                                               |
| Data collection                                                                                                |                                                                                                                                                                                                                                                                  |
| Diffractometer                                                                                                 | Huber three-circle goniometer with free kappa                                                                                                                                                                                                                    |
| Absorption correction                                                                                          | Multi-scan<br><i>SADABS2014/5</i> (Bruker, 2014/5) was used for absorption correction. <i>wR</i> <sub>2</sub> (int) was 0.0716 before and 0.0555 after correction. The ratio of minimum to maximum transmission is 0.9295. The λ/2 correction factor is 0.00150. |
| <i>T</i> <sub>min</sub> , <i>T</i> <sub>max</sub>                                                              | 0.884, 0.952                                                                                                                                                                                                                                                     |
| No. of measured, independent and observed [ <i>I</i> > 2σ( <i>I</i> )] reflections                             | 176286, 15424, 13344                                                                                                                                                                                                                                             |
| <i>R</i> <sub>int</sub>                                                                                        | 0.047                                                                                                                                                                                                                                                            |
| (sin θ/λ) <sub>max</sub> (Å <sup>-1</sup> )                                                                    | 0.601                                                                                                                                                                                                                                                            |
| Refinement                                                                                                     |                                                                                                                                                                                                                                                                  |
| <i>R</i> [ <i>F</i> <sup>2</sup> > 2σ( <i>F</i> <sup>2</sup> )], <i>wR</i> ( <i>F</i> <sup>2</sup> ), <i>S</i> | 0.052, 0.181, 1.03                                                                                                                                                                                                                                               |
| No. of reflections                                                                                             | 15424                                                                                                                                                                                                                                                            |
| No. of parameters                                                                                              | 965                                                                                                                                                                                                                                                              |
| No. of restraints                                                                                              | 573                                                                                                                                                                                                                                                              |
| H-atom treatment                                                                                               | H-atom parameters constrained                                                                                                                                                                                                                                    |
|                                                                                                                | $w = 1/[\sigma^2(F_o^2) + (0.1106P)^2 + 110.0348P]$<br>where $P = (F_o^2 + 2F_c^2)/3$                                                                                                                                                                            |
| Δρ <sub>max</sub> , Δρ <sub>min</sub> (e Å <sup>-3</sup> )                                                     | 1.97, -1.69                                                                                                                                                                                                                                                      |

**Table S2.** Crystallographic details for **1-3**

|                                                                                                                |                                                                                                                                                                                                                                                           |
|----------------------------------------------------------------------------------------------------------------|-----------------------------------------------------------------------------------------------------------------------------------------------------------------------------------------------------------------------------------------------------------|
|                                                                                                                | tim70c-vanillin_a   CCDC 1545813                                                                                                                                                                                                                          |
| Crystal data                                                                                                   |                                                                                                                                                                                                                                                           |
| Chemical formula                                                                                               | C <sub>72</sub> H <sub>48</sub> I <sub>12</sub> N <sub>24</sub> Zn <sub>6</sub> ·2.07(C <sub>8</sub> H <sub>8</sub> O <sub>3</sub> )                                                                                                                      |
| <i>M<sub>r</sub></i>                                                                                           | 3479.51                                                                                                                                                                                                                                                   |
| Crystal system, space group                                                                                    | Triclinic, <i>P</i> <sup>-</sup> 1                                                                                                                                                                                                                        |
| Temperature (K)                                                                                                | 100                                                                                                                                                                                                                                                       |
| <i>a</i> , <i>b</i> , <i>c</i> (Å)                                                                             | 14.9223 (8), 18.9078 (11), 32.5910 (18)                                                                                                                                                                                                                   |
| α, β, γ (°)                                                                                                    | 102.7281 (10), 91.7744 (10), 110.7963 (9)                                                                                                                                                                                                                 |
| <i>V</i> (Å <sup>3</sup> )                                                                                     | 8324.8 (8)                                                                                                                                                                                                                                                |
| <i>Z</i>                                                                                                       | 2                                                                                                                                                                                                                                                         |
| Radiation type                                                                                                 | Synchrotron, λ = 0.41328 Å                                                                                                                                                                                                                                |
| μ (mm <sup>-1</sup> )                                                                                          | 0.72                                                                                                                                                                                                                                                      |
| Crystal size (mm)                                                                                              | 0.3 × 0.07 × 0.04                                                                                                                                                                                                                                         |
| Data collection                                                                                                |                                                                                                                                                                                                                                                           |
| Diffractometer                                                                                                 | Huber three-circle goniometer with free kappa                                                                                                                                                                                                             |
| Absorption correction                                                                                          | Multi-scan<br>SADABS2014/5 (Bruker, 2014/5) was used for absorption correction. <i>wR</i> <sub>2</sub> (int) was 0.0635 before and 0.0569 after correction. The ratio of minimum to maximum transmission is 0.8962. The λ/2 correction factor is 0.00150. |
| <i>T</i> <sub>min</sub> , <i>T</i> <sub>max</sub>                                                              | 0.853, 0.951                                                                                                                                                                                                                                              |
| No. of measured, independent and observed [ <i>I</i> > 2σ( <i>I</i> )] reflections                             | 175431, 29411, 23438                                                                                                                                                                                                                                      |
| <i>R</i> <sub>int</sub>                                                                                        | 0.051                                                                                                                                                                                                                                                     |
| (sin θ/λ) <sub>max</sub> (Å <sup>-1</sup> )                                                                    | 0.606                                                                                                                                                                                                                                                     |
| Refinement                                                                                                     |                                                                                                                                                                                                                                                           |
| <i>R</i> [ <i>F</i> <sup>2</sup> > 2σ( <i>F</i> <sup>2</sup> )], <i>wR</i> ( <i>F</i> <sup>2</sup> ), <i>S</i> | 0.072, 0.245, 1.06                                                                                                                                                                                                                                        |
| No. of reflections                                                                                             | 29411                                                                                                                                                                                                                                                     |
| No. of parameters                                                                                              | 1471                                                                                                                                                                                                                                                      |
| No. of restraints                                                                                              | 392                                                                                                                                                                                                                                                       |
| H-atom treatment                                                                                               | H-atom parameters constrained                                                                                                                                                                                                                             |
|                                                                                                                | $w = 1/[\sigma^2(F_o^2) + (0.1312P)^2 + 50.2672P]$<br>where $P = (F_o^2 + 2F_c^2)/3$                                                                                                                                                                      |
| Δρ <sub>max</sub> , Δρ <sub>min</sub> (e Å <sup>-3</sup> )                                                     | 2.18, -1.42                                                                                                                                                                                                                                               |

**Table S3.** Crystallographic details for **1-4**

|                                                                                                                |                                                                                                                                                                                                                                                                  |
|----------------------------------------------------------------------------------------------------------------|------------------------------------------------------------------------------------------------------------------------------------------------------------------------------------------------------------------------------------------------------------------|
|                                                                                                                | zni2mof-cf3phenylazide_a   CCDC 1545814                                                                                                                                                                                                                          |
| Crystal data                                                                                                   |                                                                                                                                                                                                                                                                  |
| Chemical formula                                                                                               | C <sub>36</sub> H <sub>24</sub> I <sub>6</sub> N <sub>12</sub> Zn <sub>3</sub> ·0.68(C <sub>5</sub> H <sub>12</sub> O)·0.66(C <sub>7</sub> H <sub>4</sub> F <sub>3</sub> N <sub>3</sub> )                                                                        |
| <i>M<sub>r</sub></i>                                                                                           | 1765.98                                                                                                                                                                                                                                                          |
| Crystal system, space group                                                                                    | Monoclinic, <i>C2/c</i>                                                                                                                                                                                                                                          |
| Temperature (K)                                                                                                | 100                                                                                                                                                                                                                                                              |
| <i>a</i> , <i>b</i> , <i>c</i> (Å)                                                                             | 35.2912 (17), 14.8832 (7), 30.9415 (15)                                                                                                                                                                                                                          |
| β (°)                                                                                                          | 101.827 (1)                                                                                                                                                                                                                                                      |
| <i>V</i> (Å <sup>3</sup> )                                                                                     | 15906.9 (13)                                                                                                                                                                                                                                                     |
| <i>Z</i>                                                                                                       | 8                                                                                                                                                                                                                                                                |
| Radiation type                                                                                                 | Synchrotron, λ = 0.41328 Å                                                                                                                                                                                                                                       |
| μ (mm <sup>-1</sup> )                                                                                          | 0.75                                                                                                                                                                                                                                                             |
| Crystal size (mm)                                                                                              | 0.28 × 0.1 × 0.06                                                                                                                                                                                                                                                |
| Data collection                                                                                                |                                                                                                                                                                                                                                                                  |
| Diffractometer                                                                                                 | Bruker D8 goniometer                                                                                                                                                                                                                                             |
| Absorption correction                                                                                          | Multi-scan<br><i>SADABS2014/5</i> (Bruker, 2014/5) was used for absorption correction. <i>wR</i> <sub>2</sub> (int) was 0.1317 before and 0.0730 after correction. The ratio of minimum to maximum transmission is 0.8854. The λ/2 correction factor is 0.00150. |
| <i>T</i> <sub>min</sub> , <i>T</i> <sub>max</sub>                                                              | 0.828, 0.936                                                                                                                                                                                                                                                     |
| No. of measured, independent and observed [ <i>I</i> > 2σ( <i>I</i> )] reflections                             | 113242, 14007, 11742                                                                                                                                                                                                                                             |
| <i>R</i> <sub>int</sub>                                                                                        | 0.057                                                                                                                                                                                                                                                            |
| (sin θ/λ) <sub>max</sub> (Å <sup>-1</sup> )                                                                    | 0.596                                                                                                                                                                                                                                                            |
| Refinement                                                                                                     |                                                                                                                                                                                                                                                                  |
| <i>R</i> [ <i>F</i> <sup>2</sup> > 2σ( <i>F</i> <sup>2</sup> )], <i>wR</i> ( <i>F</i> <sup>2</sup> ), <i>S</i> | 0.058, 0.227, 1.16                                                                                                                                                                                                                                               |
| No. of reflections                                                                                             | 14007                                                                                                                                                                                                                                                            |
| No. of parameters                                                                                              | 711                                                                                                                                                                                                                                                              |
| No. of restraints                                                                                              | 73                                                                                                                                                                                                                                                               |
| H-atom treatment                                                                                               | H-atom parameters constrained                                                                                                                                                                                                                                    |
|                                                                                                                | $w = 1/[\sigma^2(F_o^2) + (0.1337P)^2 + 128.1977P]$<br>where $P = (F_o^2 + 2F_c^2)/3$                                                                                                                                                                            |
| Δρ <sub>max</sub> , Δρ <sub>min</sub> (e Å <sup>-3</sup> )                                                     | 2.61, -2.10                                                                                                                                                                                                                                                      |

**Table S4.** Crystallographic details for **1-5**

|                                                                            |                                                                                                                                                                                                                                                                                                                                                                                                                                                                                       |
|----------------------------------------------------------------------------|---------------------------------------------------------------------------------------------------------------------------------------------------------------------------------------------------------------------------------------------------------------------------------------------------------------------------------------------------------------------------------------------------------------------------------------------------------------------------------------|
|                                                                            | tim83-artemisinin-c2_c   CCDC 1545815                                                                                                                                                                                                                                                                                                                                                                                                                                                 |
| Crystal data                                                               |                                                                                                                                                                                                                                                                                                                                                                                                                                                                                       |
| Chemical formula                                                           | C <sub>72</sub> H <sub>48</sub> I <sub>12</sub> N <sub>24</sub> Zn <sub>6</sub> ·0.93(C <sub>15</sub> H <sub>22</sub> O <sub>5</sub> )·0.62(C <sub>5</sub> H <sub>12</sub> O)                                                                                                                                                                                                                                                                                                         |
| $M_r$                                                                      | 3482.07                                                                                                                                                                                                                                                                                                                                                                                                                                                                               |
| Crystal system, space group                                                | Monoclinic, <i>C2</i>                                                                                                                                                                                                                                                                                                                                                                                                                                                                 |
| Temperature (K)                                                            | 100                                                                                                                                                                                                                                                                                                                                                                                                                                                                                   |
| $a, b, c$ (Å)                                                              | 35.252 (2), 14.8612 (8), 35.233 (2)                                                                                                                                                                                                                                                                                                                                                                                                                                                   |
| $\beta$ (°)                                                                | 108.1167 (11)                                                                                                                                                                                                                                                                                                                                                                                                                                                                         |
| $V$ (Å <sup>3</sup> )                                                      | 17543.1 (17)                                                                                                                                                                                                                                                                                                                                                                                                                                                                          |
| $Z$                                                                        | 4                                                                                                                                                                                                                                                                                                                                                                                                                                                                                     |
| Radiation type                                                             | Synchrotron, $\lambda = 0.41328$ Å                                                                                                                                                                                                                                                                                                                                                                                                                                                    |
| $\mu$ (mm <sup>-1</sup> )                                                  | 0.68                                                                                                                                                                                                                                                                                                                                                                                                                                                                                  |
| Crystal size (mm)                                                          | 0.16 × 0.07 × 0.05                                                                                                                                                                                                                                                                                                                                                                                                                                                                    |
| Data collection                                                            |                                                                                                                                                                                                                                                                                                                                                                                                                                                                                       |
| Diffractometer                                                             | Huber three-circle goniometer with free kappa                                                                                                                                                                                                                                                                                                                                                                                                                                         |
| Absorption correction                                                      | Multi-scan<br><i>SADABS2014/5</i> (Bruker, 2014/5) was used for absorption correction. $wR_2(\text{int})$ was 0.1028 before and 0.0728 after correction. The ratio of minimum to maximum transmission is 0.8555. The $\lambda/2$ correction factor is 0.00150.                                                                                                                                                                                                                        |
| $T_{\min}, T_{\max}$                                                       | 0.822, 0.961                                                                                                                                                                                                                                                                                                                                                                                                                                                                          |
| No. of measured, independent and observed [ $I > 2\sigma(I)$ ] reflections | 181019, 30760, 25384                                                                                                                                                                                                                                                                                                                                                                                                                                                                  |
| $R_{\text{int}}$                                                           | 0.071                                                                                                                                                                                                                                                                                                                                                                                                                                                                                 |
| $(\sin \theta/\lambda)_{\text{max}}$ (Å <sup>-1</sup> )                    | 0.597                                                                                                                                                                                                                                                                                                                                                                                                                                                                                 |
| Refinement                                                                 |                                                                                                                                                                                                                                                                                                                                                                                                                                                                                       |
| $R[F^2 > 2\sigma(F^2)], wR(F^2), S$                                        | 0.070, 0.234, 1.07                                                                                                                                                                                                                                                                                                                                                                                                                                                                    |
| No. of reflections                                                         | 30760                                                                                                                                                                                                                                                                                                                                                                                                                                                                                 |
| No. of parameters                                                          | 1310                                                                                                                                                                                                                                                                                                                                                                                                                                                                                  |
| No. of restraints                                                          | 156                                                                                                                                                                                                                                                                                                                                                                                                                                                                                   |
| H-atom treatment                                                           | H-atom parameters constrained                                                                                                                                                                                                                                                                                                                                                                                                                                                         |
|                                                                            | $w = 1/[\sigma^2(F_o^2) + (0.1379P)^2 + 110.1P]$<br>where $P = (F_o^2 + 2F_c^2)/3$                                                                                                                                                                                                                                                                                                                                                                                                    |
| $\Delta\rho_{\text{max}}, \Delta\rho_{\text{min}}$ (e Å <sup>-3</sup> )    | 2.62, -1.22                                                                                                                                                                                                                                                                                                                                                                                                                                                                           |
| Absolute structure                                                         | Flack $x$ determined using 10229 quotients [(I+)-(I-)]/[(I+)+(I-)] (Parsons, Flack and Wagner, <i>Acta Cryst. B</i> 69 (2013) 249-259). Hooft $y$ (Hooft, Straver and Spek, <i>J. Appl. Cryst.</i> (2008) 96-103.). A three-hypothesis model based on Bayesian statistical analysis on Bijvoet pairs using a Student's $t$ -distribution was employed to determine absolute configuration. $p3(\text{true}) = 1.000$ , $p3(\text{false}) = 0.0E+00$ , $p3(\text{rac-twin}) = 0.3E-37$ |
| Absolute structure parameter                                               | Flack $x$ : 0.18(3); Hooft $y$ : 0.15(2); $p3(\text{true}) = 1.000$ , $p3(\text{false}) = 0.0E+00$ , $p3(\text{rac-twin}) = 0.3E-37$                                                                                                                                                                                                                                                                                                                                                  |

## Void Analysis

Void volume and total void percentage (relative to unit cell volume) for the soaked crystalline sponges were determined using PLATON/SQUEEZE (A. L. Spek, *Acta Crystallogr., Sect. C.: Struct. Chem.*, 2015, **71**, 9) (note: all structures reported in this article are UNSQUEEZED and have not been treated with other residual electron density attenuation programs).

**1·2:** Void Volume: 2987 Å<sup>3</sup>, Void Percentage: 17%

**1·3:** Void Volume: 2590 Å<sup>3</sup>, Void Percentage: 31%

**1·4:** Void Volume: 4420 Å<sup>3</sup>, Void Percentage: 28%

**1·5:** Void Volume: 7300 Å<sup>3</sup>, Void Percentage: 42%
